# Supplementary material
Source: Springer Nature journal article supplement (https://www.springermedizin.de/resource/supplementary/12943_2008_409_MOESM7_ESM.pdf/9554200)

GM6914 Treated with Gö6976 for 24 hrs

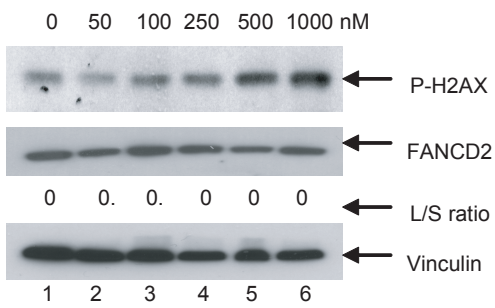

GM6914A Treated with Gö6976 for 24 hrs

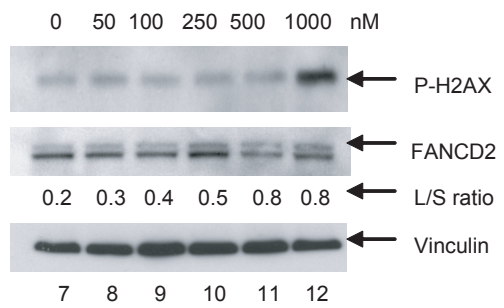

Supplement: MOESM7 [file 9554200]
